# Supplementary material for: Structure, molecular motion, and phase transition of a highly disordered crystal [Co(NH3)6](ClO4)3
Source: Royal Society of Chemistry journal article supplement (doi:10.1039/c2ra01184k), 2012-01-01
Supplement: c2ra01184k.pdf [file c2ra01184k.pdf]

S1. Molar heat capacity of  $[\text{Co}(\text{NH}_3)_6](\text{ClO}_4)_3$ .  $M=459.47 \text{ g mol}^{-1}$ .

| $T/\text{K}$ | $C_p/\text{J K}^{-1} \text{ mol}^{-1}$ | $T/\text{K}$ | $C_p/\text{J K}^{-1} \text{ mol}^{-1}$ | $T/\text{K}$ | $C_p/\text{J K}^{-1} \text{ mol}^{-1}$ |
|--------------|----------------------------------------|--------------|----------------------------------------|--------------|----------------------------------------|
| 14.753       | 14.93                                  | 65.563       | 195.44                                 | 92.785       | 270.30                                 |
| 16.330       | 19.50                                  | 66.774       | 198.69                                 | 93.555       | 272.52                                 |
| 17.892       | 24.59                                  | 67.261       | 199.58                                 | 93.890       | 273.80                                 |
| 19.460       | 30.10                                  | 67.987       | 201.65                                 | 94.059       | 274.94                                 |
| 21.003       | 35.81                                  | 69.057       | 203.95                                 | 95.603       | 281.60                                 |
| 22.515       | 41.70                                  | 69.202       | 204.78                                 | 95.671       | 282.26                                 |
| 24.011       | 47.56                                  | 70.419       | 207.83                                 | 97.455       | 293.61                                 |
| 25.491       | 53.23                                  | 70.845       | 208.34                                 | 97.641       | 296.05                                 |
| 26.979       | 59.55                                  | 71.638       | 210.78                                 | 99.682       | 283.49                                 |
| 28.456       | 66.06                                  | 72.627       | 212.56                                 | 101.736      | 274.05                                 |
| 29.915       | 72.31                                  | 72.858       | 213.64                                 | 103.796      | 273.99                                 |
| 31.353       | 78.25                                  | 74.082       | 216.43                                 | 105.856      | 276.24                                 |
| 32.770       | 83.89                                  | 74.403       | 216.79                                 | 107.916      | 280.79                                 |
| 34.166       | 89.89                                  | 75.307       | 219.34                                 | 109.975      | 287.39                                 |
| 35.540       | 95.68                                  | 76.176       | 220.96                                 | 112.034      | 287.95                                 |
| 36.895       | 101.09                                 | 76.535       | 222.37                                 | 114.105      | 285.37                                 |
| 38.233       | 106.12                                 | 77.765       | 225.43                                 | 116.183      | 287.72                                 |
| 39.556       | 110.79                                 | 77.946       | 225.45                                 | 118.267      | 290.15                                 |
| 40.866       | 115.38                                 | 78.998       | 228.25                                 | 120.356      | 292.68                                 |
| 42.163       | 119.99                                 | 79.715       | 229.35                                 | 122.450      | 295.39                                 |
| 43.449       | 124.65                                 | 80.235       | 231.14                                 | 124.551      | 298.08                                 |
| 44.724       | 129.49                                 | 81.474       | 233.80                                 | 126.659      | 300.76                                 |
| 45.989       | 134.15                                 | 81.483       | 234.11                                 | 128.774      | 303.04                                 |
| 47.246       | 138.83                                 | 82.717       | 237.43                                 | 130.897      | 305.76                                 |
| 48.494       | 143.60                                 | 83.251       | 237.93                                 | 133.027      | 308.61                                 |
| 49.735       | 148.09                                 | 83.964       | 240.38                                 | 135.164      | 311.10                                 |
| 50.970       | 152.42                                 | 85.021       | 242.74                                 | 137.310      | 313.66                                 |
| 52.199       | 156.65                                 | 85.214       | 243.51                                 | 139.464      | 316.31                                 |
| 53.424       | 160.78                                 | 86.467       | 247.11                                 | 141.627      | 319.21                                 |
| 54.644       | 164.65                                 | 86.791       | 247.47                                 | 143.799      | 321.71                                 |
| 55.862       | 168.14                                 | 87.349       | 248.71                                 | 145.979      | 324.35                                 |
| 57.079       | 171.71                                 | 87.724       | 250.44                                 | 148.170      | 326.89                                 |
| 58.293       | 175.14                                 | 88.563       | 252.67                                 | 150.369      | 329.76                                 |
| 59.506       | 178.69                                 | 88.984       | 254.57                                 | 152.578      | 332.41                                 |
| 60.719       | 182.25                                 | 89.430       | 255.37                                 | 154.797      | 335.22                                 |
| 61.930       | 185.40                                 | 90.248       | 259.04                                 | 157.025      | 337.93                                 |
| 63.141       | 188.71                                 | 90.337       | 259.07                                 | 159.264      | 340.42                                 |
| 63.167       | 189.05                                 | 91.498       | 264.35                                 | 161.513      | 343.10                                 |
| 64.351       | 192.22                                 | 91.515       | 264.96                                 | 163.771      | 345.94                                 |
| 65.453       | 194.88                                 | 92.113       | 267.08                                 | 166.041      | 348.41                                 |

S1. continued.

| $T/K$   | $C_p/J K^{-1} mol^{-1}$ | $T/K$   | $C_p/J K^{-1} mol^{-1}$ | $T/K$   | $C_p/J K^{-1} mol^{-1}$ |
|---------|-------------------------|---------|-------------------------|---------|-------------------------|
| 168.321 | 351.21                  | 282.302 | 490.34                  | 333.956 | 1591.37                 |
| 170.612 | 354.44                  | 285.650 | 495.51                  | 334.168 | 1653.04                 |
| 172.913 | 357.28                  | 289.014 | 500.52                  | 334.554 | 564.74                  |
| 175.225 | 359.65                  | 292.395 | 505.45                  | 334.815 | 562.87                  |
| 177.548 | 362.31                  | 295.793 | 509.86                  | 334.994 | 556.19                  |
| 179.883 | 365.33                  | 296.143 | 510.46                  | 335.650 | 551.63                  |
| 182.229 | 367.93                  | 299.207 | 515.33                  | 336.283 | 554.31                  |
| 184.585 | 370.95                  | 299.654 | 516.04                  | 336.546 | 554.05                  |
| 186.954 | 374.01                  | 303.180 | 521.90                  | 337.502 | 554.78                  |
| 189.334 | 376.71                  | 306.723 | 527.25                  | 338.417 | 556.53                  |
| 191.725 | 379.41                  | 307.819 | 531.10                  | 338.517 | 557.13                  |
| 194.127 | 382.09                  | 310.005 | 532.86                  | 339.593 | 557.10                  |
| 196.621 | 384.95                  | 310.283 | 534.56                  | 340.548 | 557.23                  |
| 199.309 | 389.18                  | 312.185 | 537.82                  | 340.726 | 556.48                  |
| 202.116 | 392.50                  | 313.858 | 540.87                  | 341.921 | 558.31                  |
| 204.944 | 395.97                  | 314.358 | 541.84                  | 342.674 | 557.91                  |
| 207.793 | 399.66                  | 316.527 | 546.15                  | 343.292 | 558.86                  |
| 210.662 | 403.11                  | 317.453 | 547.62                  | 344.796 | 559.82                  |
| 213.553 | 406.02                  | 318.690 | 550.57                  | 344.812 | 560.47                  |
| 216.464 | 409.25                  | 320.850 | 555.40                  | 346.631 | 560.07                  |
| 219.396 | 412.62                  | 320.940 | 555.82                  | 346.916 | 563.04                  |
| 222.349 | 416.28                  | 322.703 | 560.99                  | 349.032 | 563.49                  |
| 225.322 | 419.68                  | 324.000 | 562.79                  | 349.347 | 563.25                  |
| 228.317 | 423.78                  | 324.248 | 564.77                  |         |                         |
| 231.331 | 427.25                  | 325.786 | 570.75                  |         |                         |
| 234.367 | 430.48                  | 326.441 | 571.93                  |         |                         |
| 237.422 | 434.49                  | 327.321 | 578.02                  |         |                         |
| 240.498 | 438.64                  | 328.268 | 578.53                  |         |                         |
| 243.593 | 441.27                  | 328.852 | 589.04                  |         |                         |
| 246.710 | 444.76                  | 329.791 | 589.95                  |         |                         |
| 249.848 | 448.58                  | 330.381 | 603.80                  |         |                         |
| 253.006 | 452.31                  | 331.300 | 618.92                  |         |                         |
| 256.185 | 456.27                  | 331.359 | 626.31                  |         |                         |
| 259.382 | 460.47                  | 331.793 | 629.25                  |         |                         |
| 262.599 | 464.20                  | 332.224 | 646.72                  |         |                         |
| 265.836 | 468.72                  | 332.651 | 678.39                  |         |                         |
| 269.092 | 473.52                  | 332.776 | 699.74                  |         |                         |
| 272.366 | 477.74                  | 333.070 | 741.40                  |         |                         |
| 275.659 | 481.72                  | 333.473 | 943.41                  |         |                         |
| 278.972 | 485.89                  | 333.835 | 1468.89                 |         |                         |

S2. Molar heat capacity of  $[\text{Co}(\text{NH}_3)_6](\text{ClO}_4)_3$  after annealed at 98.3 K for 10 h.

| $T/\text{K}$ | $C_p/\text{J K}^{-1} \text{mol}^{-1}$ | $T/\text{K}$ | $C_p/\text{J K}^{-1} \text{mol}^{-1}$ | $T/\text{K}$ | $C_p/\text{J K}^{-1} \text{mol}^{-1}$ |
|--------------|---------------------------------------|--------------|---------------------------------------|--------------|---------------------------------------|
| 9.777        | 4.86                                  | 59.482       | 176.24                                | 108.645      | 286.86                                |
| 10.723       | 6.34                                  | 60.171       | 178.36                                | 108.989      | 288.41                                |
| 11.635       | 7.98                                  | 60.848       | 180.28                                | 109.333      | 290.77                                |
| 12.523       | 9.74                                  | 61.514       | 182.04                                | 109.675      | 293.44                                |
| 13.392       | 11.70                                 | 62.507       | 184.78                                | 110.016      | 296.93                                |
| 14.245       | 13.70                                 | 63.842       | 188.53                                | 110.354      | 300.07                                |
| 15.085       | 15.92                                 | 65.196       | 191.98                                | 110.689      | 304.79                                |
| 16.227       | 19.29                                 | 66.567       | 195.55                                | 111.021      | 313.38                                |
| 17.639       | 23.76                                 | 67.955       | 199.51                                | 111.350      | 315.48                                |
| 19.009       | 28.45                                 | 69.359       | 202.42                                | 111.678      | 315.83                                |
| 20.360       | 33.30                                 | 70.778       | 205.71                                | 112.005      | 318.36                                |
| 21.765       | 38.63                                 | 72.212       | 208.96                                | 112.331      | 318.12                                |
| 23.181       | 44.10                                 | 73.660       | 212.50                                | 112.661      | 307.21                                |
| 24.587       | 49.54                                 | 75.122       | 215.98                                | 112.994      | 298.64                                |
| 25.972       | 54.81                                 | 76.598       | 219.16                                | 113.331      | 289.49                                |
| 27.329       | 60.77                                 | 78.085       | 223.03                                | 113.669      | 286.89                                |
| 28.656       | 66.55                                 | 79.584       | 226.44                                | 114.072      | 286.14                                |
| 29.974       | 71.96                                 | 81.096       | 230.04                                | 114.603      | 286.05                                |
| 31.264       | 77.37                                 | 82.620       | 233.84                                | 115.260      | 286.75                                |
| 32.508       | 82.34                                 | 84.156       | 237.55                                | 116.042      | 287.92                                |
| 34.018       | 88.74                                 | 85.703       | 241.57                                | 116.946      | 288.96                                |
| 35.740       | 95.93                                 | 87.263       | 245.53                                | 118.222      | 290.42                                |
| 37.408       | 102.44                                | 88.834       | 249.72                                | 119.816      | 292.51                                |
| 38.932       | 107.79                                | 90.416       | 254.69                                | 121.426      | 294.42                                |
| 40.332       | 112.58                                | 92.008       | 260.76                                | 123.052      | 296.45                                |
| 41.780       | 117.67                                | 93.610       | 266.20                                |              |                                       |
| 43.265       | 122.92                                | 95.223       | 271.33                                |              |                                       |
| 44.778       | 128.51                                | 96.846       | 277.25                                |              |                                       |
| 46.313       | 134.24                                | 98.477       | 284.72                                |              |                                       |
| 47.863       | 141.09                                | 100.122      | 279.24                                |              |                                       |
| 49.425       | 146.29                                | 101.784      | 275.84                                |              |                                       |
| 51.000       | 150.84                                | 103.463      | 274.38                                |              |                                       |
| 52.584       | 156.05                                | 105.155      | 275.86                                |              |                                       |
| 54.018       | 160.46                                | 106.183      | 277.21                                |              |                                       |
| 55.050       | 163.51                                | 106.538      | 278.56                                |              |                                       |
| 55.829       | 165.56                                | 106.891      | 278.74                                |              |                                       |
| 56.590       | 167.98                                | 107.244      | 280.28                                |              |                                       |
| 57.335       | 169.97                                | 107.595      | 281.87                                |              |                                       |
| 58.064       | 172.37                                | 107.946      | 282.01                                |              |                                       |
| 58.780       | 174.30                                | 108.296      | 284.15                                |              |                                       |

S3. Molar heat capacity of  $[\text{Co}(\text{NH}_3)_6](\text{ClO}_4)_3$  after annealed at 90.9 K for 30 h.

| $T/\text{K}$ | $C_p/\text{J K}^{-1} \text{mol}^{-1}$ | $T/\text{K}$ | $C_p/\text{J K}^{-1} \text{mol}^{-1}$ | $T/\text{K}$ | $C_p/\text{J K}^{-1} \text{mol}^{-1}$ |
|--------------|---------------------------------------|--------------|---------------------------------------|--------------|---------------------------------------|
| 13.412       | 12.06                                 | 79.683       | 224.28                                | 107.017      | 279.03                                |
| 14.928       | 15.80                                 | 81.043       | 227.45                                | 107.506      | 280.25                                |
| 16.464       | 20.20                                 | 82.378       | 230.69                                | 107.992      | 280.31                                |
| 18.002       | 25.12                                 | 83.689       | 233.69                                | 108.476      | 282.25                                |
| 19.524       | 30.40                                 | 84.978       | 236.76                                | 108.958      | 283.95                                |
| 21.005       | 35.83                                 | 86.246       | 239.90                                | 109.437      | 285.53                                |
| 22.530       | 41.65                                 | 87.495       | 242.80                                | 109.911      | 290.53                                |
| 24.148       | 47.91                                 | 88.726       | 245.89                                | 110.378      | 314.03                                |
| 25.794       | 54.14                                 | 89.939       | 249.31                                | 110.830      | 332.23                                |
| 27.434       | 61.19                                 | 90.825       | 252.05                                | 111.270      | 358.51                                |
| 29.007       | 67.94                                 | 91.390       | 253.97                                | 111.698      | 413.83                                |
| 30.390       | 73.61                                 | 91.951       | 255.52                                | 112.130      | 375.85                                |
| 31.712       | 78.93                                 | 92.510       | 256.99                                | 112.571      | 348.05                                |
| 33.155       | 84.69                                 | 93.065       | 258.34                                | 113.025      | 308.93                                |
| 34.679       | 91.21                                 | 93.616       | 260.52                                | 113.490      | 291.97                                |
| 36.256       | 97.74                                 | 94.164       | 262.10                                | 113.957      | 288.08                                |
| 37.689       | 102.88                                | 94.710       | 263.55                                | 114.425      | 287.99                                |
| 39.061       | 107.47                                | 95.252       | 265.26                                | 114.891      | 287.36                                |
| 40.590       | 112.67                                | 95.791       | 266.87                                | 115.420      | 287.94                                |
| 42.209       | 118.42                                | 96.328       | 267.96                                | 116.201      | 288.63                                |
| 43.897       | 124.44                                | 96.860       | 270.35                                | 117.481      | 289.94                                |
| 45.636       | 130.87                                | 97.390       | 272.90                                | 119.080      | 291.84                                |
| 47.412       | 139.20                                | 97.916       | 277.18                                |              |                                       |
| 49.066       | 144.66                                | 98.442       | 277.26                                |              |                                       |
| 50.631       | 148.39                                | 98.963       | 277.92                                |              |                                       |
| 52.280       | 153.19                                | 99.479       | 278.13                                |              |                                       |
| 53.999       | 158.39                                | 99.994       | 278.36                                |              |                                       |
| 55.778       | 163.49                                | 100.507      | 278.42                                |              |                                       |
| 57.609       | 168.70                                | 101.018      | 278.49                                |              |                                       |
| 59.485       | 174.00                                | 101.527      | 277.09                                |              |                                       |
| 61.401       | 179.44                                | 102.035      | 275.38                                |              |                                       |
| 63.353       | 184.99                                | 102.541      | 275.07                                |              |                                       |
| 65.307       | 190.28                                | 103.045      | 274.62                                |              |                                       |
| 67.239       | 195.28                                | 103.548      | 274.53                                |              |                                       |
| 69.150       | 199.65                                | 104.049      | 275.18                                |              |                                       |
| 71.046       | 203.87                                | 104.548      | 275.23                                |              |                                       |
| 72.929       | 208.31                                | 105.045      | 276.00                                |              |                                       |
| 74.802       | 212.77                                | 105.541      | 277.09                                |              |                                       |
| 76.666       | 217.09                                | 106.035      | 277.13                                |              |                                       |
| 78.297       | 221.05                                | 106.527      | 278.16                                |              |                                       |
